# Supplementary material for: Achieving high thermoelectric performance through constructing coherent interfaces and building interface potential barriers in n-type Bi2Te3/Bi2Te2.7Se0.3 nanocomposites
Source: Royal Society of Chemistry journal article supplement (doi:10.1039/c9ta05798f), 2019-01-01
Supplement: c9ta05798f1.pdf [file c9ta05798f1.pdf]

# Supporting Information

## Achieving high thermoelectric performance through constructing coherent interfaces and building interface potential barriers in n-type Bi<sub>2</sub>Te<sub>3</sub>/Bi<sub>2</sub>Te<sub>2.7</sub>Se<sub>0.3</sub> nanocomposites

*Bushra Jabar*<sup>a,b</sup>, *Xiaoying Qin*<sup>a,\*</sup>, *Di Li*<sup>a</sup>, *Jian Zhang*<sup>a</sup>, *Adil Mansoor*<sup>a</sup>, *Hongxing Xin*<sup>a</sup>, *Chunjun Song*<sup>a</sup>, *Lu.Lu. Huang*<sup>a,b</sup>

<sup>a</sup> Key laboratory of Material Physics, Institute of Solid State Physics, Chinese Academy of Sciences, Hefei 230031, China.

E-mail: xyqin@issp.ac.cn.

<sup>b</sup> University of Science and Technology of China, Hefei 230026, China.

\*Corresponding author

Xiaoying Qin,

Key laboratory of Material Physics, Institute of Solid State Physics, Chinese Academy of Sciences, Hefei 230031, China.

E-mail: xyqin@issp.ac.cn.

### 1. The analysis of preferred orientation

The (001) preferred orientation possible in all the composites specimens  $\beta\text{Bi}_2\text{Te}_3/\text{Bi}_2\text{Te}_{2.7}\text{Se}_{0.3}$  ( $\beta=0, 0.1$  to  $0.3, 0.5$  and  $0.8$  vol.%) was analyzed. The orientation factor F can be determined as following [1]

$$F = \frac{p - p_o}{p - p_o}; p = \frac{I(00l)}{\sum I(hkl)}, p_o = \frac{I_o(00l)}{\sum I_o(hkl)} \quad (\text{S-1})$$

where  $p$  and  $p_o$  represents the ratio integrated intensities of all (00 $l$ ) plane to the summation of all ( $hkl$ ) plane intensities for composite and reference specimen, respectively. The calculated F values are 0.10, 0.16, 0.11, 0.14 and 0.05 for  $\beta=0, 0.1, 0.3, 0.5$  and  $0.8$  vol.%, respectively, as

shown in table S1. The obtained result indicates that there is more or less preferred (001) orientation for every specimen.

However, one notices that among composite specimens the orientation factor  $F$  (0.14) for the specimen with  $\beta=0.5$  vol.% is apparently larger than that ( $F=0.11$ ) for the specimen with  $\beta=0.3$  vol.%, which should impact their electrical transport properties (as discussed in main text).

**Table S1.** A list of (001) preferred orientation factor  $F$  for all the composite specimens  $\beta\text{Bi}_2\text{Te}_3/\text{Bi}_2\text{Te}_{2.7}\text{Se}_{0.3}$  ( $\beta=0, 0.1$  to  $0.3, 0.5$  and  $0.8$  vol.%)

| $\beta$ (vol.%) | 0    | 0.1  | 0.3  | 0.5  | 0.8  |
|-----------------|------|------|------|------|------|
| F               | 0.10 | 0.16 | 0.11 | 0.14 | 0.05 |

## 2. Rietveld refinement analysis

Rietveld refinement analyses for all specimens  $\beta\text{Bi}_2\text{Te}_3/\text{Bi}_2\text{Te}_{2.7}\text{Se}_{0.3}$  ( $\beta=0, 0.1, 0.3, 0.5$  and  $0.8$  vol. %) are performed, as shown in Fig. S1(a)-(e). The results indicate that the contents of secondary phase  $\text{Bi}_2\text{Te}_3$  in composite specimens are in good agreement with the incorporated content ( $\beta$ ) in  $\beta\text{Bi}_2\text{Te}_3/\text{Bi}_2\text{Te}_{2.7}\text{Se}_{0.3}$ , as given in table S2.

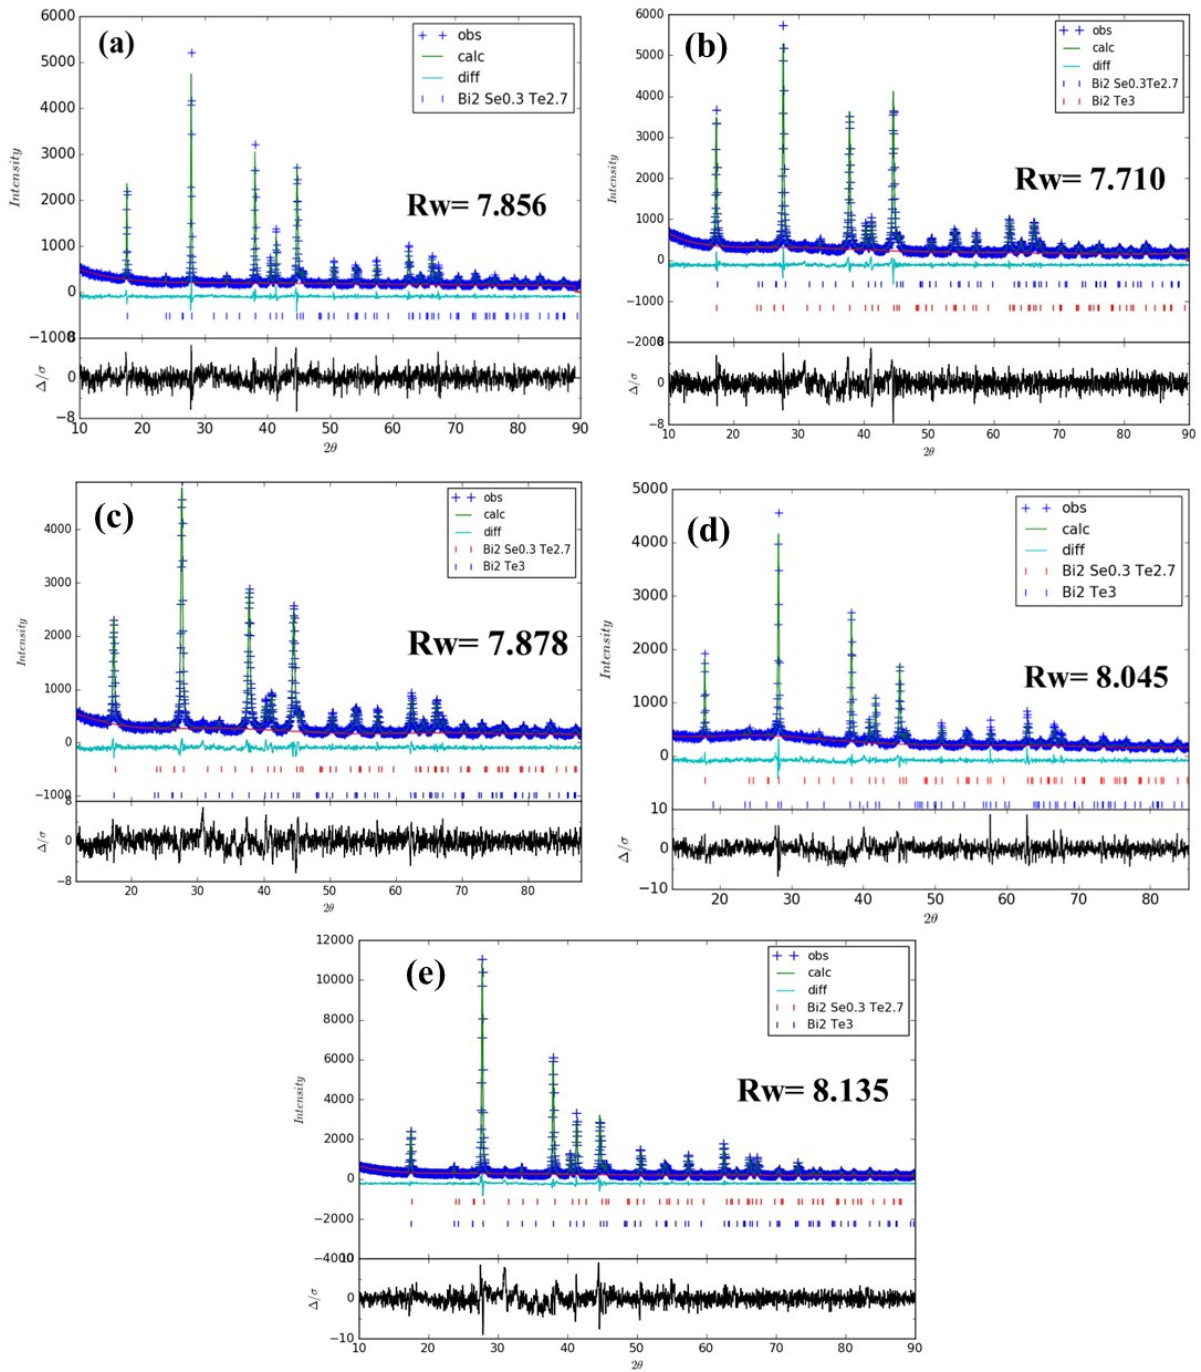

**Figure S1.** (a) Rietveld refinement analysis for  $\beta\text{Bi}_2\text{Te}_3/\text{Bi}_2\text{Te}_{2.7}\text{Se}_{0.3}$  (a) with  $\beta=0$ , (b)  $\beta=0.1$  (c)  $\beta=0.3$  and (d)  $\beta=0.5$  and (e)  $\beta=0.8$  vol.% where obs, calc, and diff represents observed, calculated and residual differences between the two curves.

**Table S2.** Rietveld refinement parameters for  $\beta\text{Bi}_2\text{Te}_3/\text{Bi}_2\text{Te}_{2.7}\text{Se}_{0.3}$  ( $\beta=0, 0.1, 0.3, 0.5$  and  $0.8$  vol.%)

| $\beta$<br>vol.% | $R_{\text{exp}}$<br>(%) | $R_w$<br>(%) | $\text{Bi}_2\text{Te}_3$<br>(vol.%) | GOF  |
|------------------|-------------------------|--------------|-------------------------------------|------|
| 0                | 6.04                    | 7.856        | 0                                   | 1.30 |
| 0.1              | 5.468                   | 7.710        | 0.08                                | 1.41 |
| 0.3              | 5.396                   | 7.878        | 0.20                                | 1.46 |
| 0.5              | 5.5868                  | 8.045        | 0.44                                | 1.44 |
| 0.8              | 4.990                   | 8.135        | 1.00                                | 1.63 |

### 3. Microstructure characterizations by using FE-SEM and EDS.

The microstructures of BTS, BT inclusions and composite bulk specimens  $\beta\text{Bi}_2\text{Te}_3/\text{Bi}_2\text{Te}_{2.7}\text{Se}_{0.3}$  were further investigated by using field emission scanning electron microscopy (FE-SEM) and energy dispersive X-ray spectroscopy (EDX). FE-SEM observations show that the particles of BTS matrix powders have the dimensions of micrometers (Fig. S2(a)); while most of  $\text{Bi}_2\text{Te}_3$  particles have sizes of  $\sim 50$  nm (Fig. S2(b) and Fig. S3). Appropriately, on the fracture surface of the composite specimens ( $\beta=0.5\text{vol}\%$ , for instance) (Fig. S2(c)) one can find out some nanoparticles with size of 50-100nm, corresponding to which there is a shortage of element Se, as shown by element mapping of EDX (Fig. S2(e)). Hence these particles on the fracture surface can be ascribed to  $\text{Bi}_2\text{Te}_3$  inclusions.

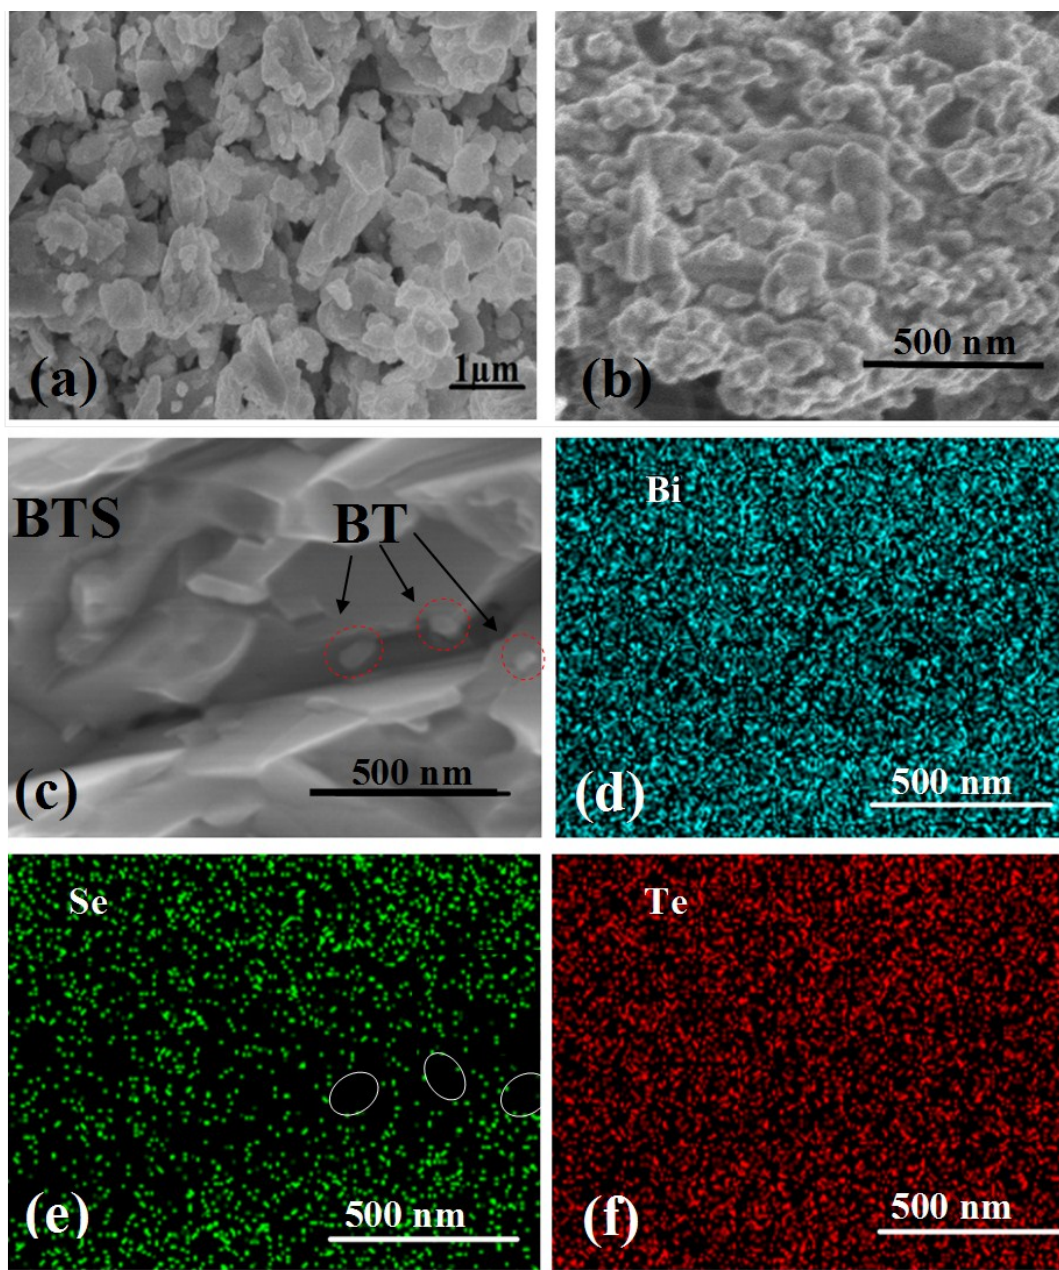

**Figure S2.** (a) FE-SEM micrographs of powders of  $\text{Bi}_2\text{Te}_{2.7}\text{Se}_{0.3}$  and (b)  $\text{Bi}_2\text{Te}_3$  nanoparticles (c) EDX analysis for composite specimen  $f = 0.5\text{vol}\%$  at  $500\text{nm}$ ; (d) a EDX mapping for element Bi (e) for Se and (f) for Te element in selected area for specimen  $f = 0.5\text{ vol}\%$ .

#### 4. Statistical analysis result of size distribution of Bi<sub>2</sub>Te<sub>3</sub> nanoparticles

We statistically analyzed the size distribution of Bi<sub>2</sub>Te<sub>3</sub> nanoparticles, based on the FE-SEM observations (as shown in Fig. S2(b)). Fig. S3 gives the results, which indicates that most of Bi<sub>2</sub>Te<sub>3</sub> particles have sizes of ~50 nm.

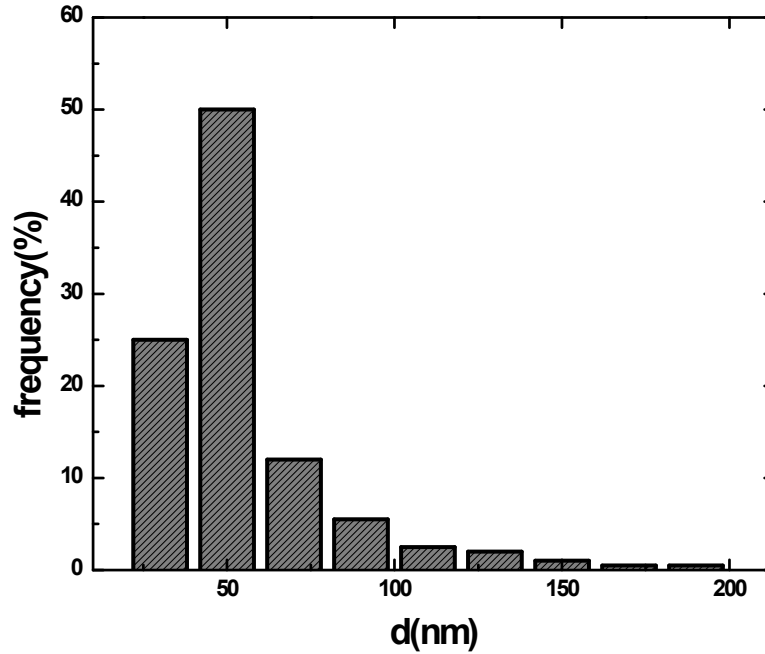

**Figure S3.** Size distribution of Bi<sub>2</sub>Te<sub>3</sub> nanoparticles.

#### 5. The change of electronic concentration, mobility and resistivity (at 300 K) of the specimens with different BT content $\beta$

The electrical resistivity ( $\rho$ ) is determined by carrier concentration ( $n$ ) and mobility ( $\mu$ ) and there

is a relation  $\rho = 1/ne\mu$ . Hence, the relative change of the resistivity  $\frac{\Delta\rho}{\rho}$  is related to relative

change of carrier concentration  $\frac{\Delta n}{n}$  and mobility  $\frac{\Delta\mu}{\mu}$  by the relation  $\frac{\Delta\rho}{\rho} = -\left(\frac{\Delta n}{n} + \frac{\Delta\mu}{\mu}\right)$ . In the

composite specimens  $\beta\text{Bi}_2\text{Te}_3/\text{Bi}_2\text{Te}_{2.7}\text{Se}_{0.3}$ , the variations of the resistivity are directly associated with change of both carrier concentration and mobility. Table S3-1 shows electronic concentration ( $n$ ) and mobility ( $\mu$ ) for all  $\beta\text{Bi}_2\text{Te}_3/\text{Bi}_2\text{Te}_{2.7}\text{Se}_{0.3}$  specimens. The relative changes of concentration, mobility and the resistivity for specimens with different  $\beta$  are given in table S3-2.

**Table S3-1** The carrier concentration ( $n$ ) and mobility ( $\mu$ ) (at 300K) for specimen  $\beta\text{Bi}_2\text{Te}_3/\text{Bi}_2\text{Te}_{2.7}\text{Se}_{0.3}$  ( $\beta=0, 0.1, 0.3, 0.5$  and  $0.8$  vol.%)

| $\beta$ (vol.%)                                   | 0     | 0.1   | 0.3   | 0.5   | 0.8  |
|---------------------------------------------------|-------|-------|-------|-------|------|
| $n$ ( $\times 10^{19}\text{cm}^{-3}$ )            | 6.43  | 6.96  | 7.34  | 7.94  | 8.74 |
| $\mu$ ( $\text{cm}^2\text{V}^{-1}\text{s}^{-1}$ ) | 122.5 | 128.2 | 104.9 | 108.8 | 83.4 |

**Table S3-2** Relative changes of  $n$ ,  $\mu$  and  $\rho$  (at 300K) for  $\beta\text{Bi}_2\text{Te}_3/\text{Bi}_2\text{Te}_{2.7}\text{Se}_{0.3}$  specimens with different  $\beta$

| $\beta_j-\beta_i$ (vol.%) | 0.1-0.0 | 0.3- 0.1 | 0.5- 0.3 | 0.8-0.5 |
|---------------------------|---------|----------|----------|---------|
| $\Delta n/n$ (%)          | 8.24    | 5.58     | 8.18     | 10.00   |
| $\Delta\mu/\mu$ (%)       | 4.68    | -18.22   | 3.73     | -23.29  |
| $\Delta\rho/\rho$ (%)     | -12.92  | 12.64    | -11.91   | 13.29   |

Annotation:  $\beta_j-\beta_i$  stands for relative changes of the properties ( $\Delta n/n$ ,  $\Delta\mu/\mu$  and  $\Delta\rho/\rho$ ) of the composite specimen with  $\beta_j$  (e.g.  $\beta_j=0.3$  vol.%) as compared to those of the specimen with  $\beta_i$  (e.g.  $\beta_i=0.1$  vol.%), which simply written as: 0.3- 0.1 (vol.%), as shown in third column.

## 6. Dependence of PF on carrier concentration

Fig. S4 shows the dependence of power factor PF on carrier concentration  $n$  for matrix BTS (solid line) (at 300 K). One can see clearly that PF for the composite specimens with  $\beta=0.1$  and  $0.5$  vol.% (red hexagonal and blue square, respectively) enhances substantially as compared to that of BTS matrix.

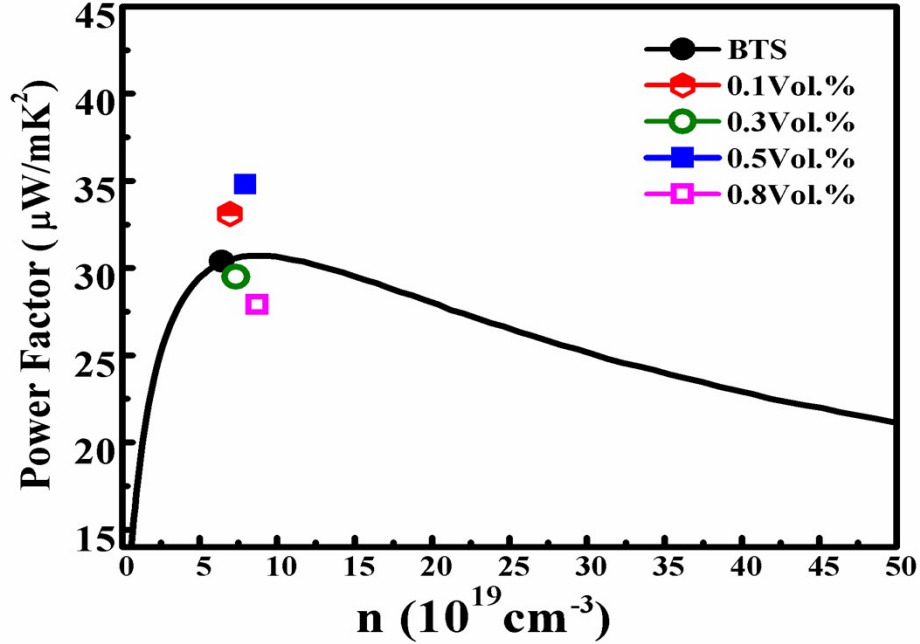

**Figure S4.** The dependence of power factor on carrier concentration for matrix BTS (at 300 K), where the values of PF for composite specimens  $\beta\text{Bi}_2\text{Te}_3/\text{Bi}_2\text{Te}_{2.7}\text{Se}_{0.3}$  ( $\beta=0, 0.1$  to  $0.3, 0.5$  and  $0.8$  vol. %) are also illustrated.

## 7. Measurement of density

We have measured densities for all of the samples by using Archimedes method, and the results indicated that the relative densities  $d_r$  of all of our samples are very high, reaching 98-99% , as shown in the table S3.

**Table S4.** Densities  $d$  and relative densities  $d_r$  for all the composite specimens  $\beta\text{Bi}_2\text{Te}_3/\text{Bi}_2\text{Te}_{2.7}\text{Se}_{0.3}$  ( $\beta= 0, 0.1, 0.3, 0.5$  and  $0.8$  vol.%)

| $\beta$ vol.% | $d$  | $d_r$ |
|---------------|------|-------|
| 0             | 7.87 | 99.4  |
| 0.1           | 7.8  | 98.6  |
| 0.3           | 7.84 | 99.1  |
| 0.5           | 7.75 | 97.9  |
| 0.8           | 7.74 | 97.8  |



where  $d_r$  is relative density, defined as  $d_r=d/d_0$ , here  $d$  is the measured density and  $d_0$  ( $7.91 \text{ g cm}^{-3}$ ) is the theoretical density of  $\text{Bi}_2\text{Te}_{2.7}\text{Se}_{0.3}$ . For composite specimens  $\beta\text{Bi}_2\text{Te}_3/\text{Bi}_2\text{Te}_{2.7}\text{Se}_{0.3}$ , the theoretical density is modified as:  $d_0= [1-\beta] d_1 + \beta d_2$ , where  $d_1=d_0$  for BTS matrix and  $d_2$  ( $7.86 \text{ g cm}^{-3}$ ) is the theoretical density of  $\text{Bi}_2\text{Te}_3$ .

## 8. Measurement of specific heat

The specific heat for BTS matrix and composite specimens was determined by DSC, which shows that the obtained  $C_{pm}$  for BTS almost equals to Dulong-Petit law, as given in the Fig. S5. The specific heat  $C_{pc}$  for composite specimens is actually same as that of BTS (within experimental error) due to both BT having similar specific heat to BTS and very small contents of BT in BTS matrix.

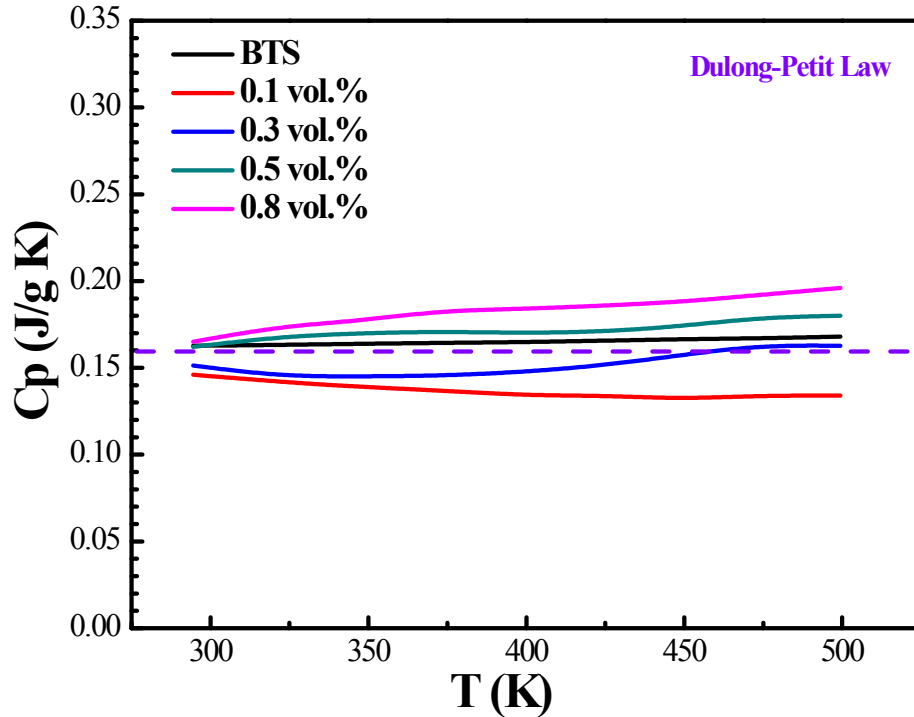

**Figure S5.** (a) Temperature dependent specific heat capacity  $C_{pm}$  for  $\text{Bi}_2\text{Te}_{2.7}\text{Se}_{0.3}$  and  $C_{pc}$  for  $\beta\text{BT}/\text{BTS}$  with  $\beta=0, 0.1, 0.3, 0.5$  and  $0.8 \text{ vol.}\%$ .

## 9. Repeatability and thermal stability (at $T \leq 525\text{K}$ ) of the thermoelectric properties for our BTS composite specimen (incorporated with 0.5 vol.% BT)

We conducted experiments to show repeatability and thermal stability for BTS based composites with BT nano-inclusions ( $\beta=0.5$  vol. %, for instance), as shown below.

### (1) Repeatability

The electrical resistivity  $\rho$  (a), thermopower  $S$  (b) and total thermal conductivity  $\kappa$  (c) were measured for three specimens (specimens 1#, 2# and 3#) (as given in Fig. R3 below), and the results indicated that repeatability of the specimen properties is good with standard deviation for  $\rho$ ,  $S$  and  $\kappa$  is  $\pm 3\%-\pm 4\%$ ,  $\pm 1\%-\pm 2\%$  and  $\pm 4\%-\pm 5\%$  at 300K and 525K, respectively. According to error propagation theory:

$$\text{Since } Z = \frac{S^2}{\rho \cdot \kappa} \quad (\text{S-2})$$

then,

$$\begin{aligned} \Delta Z &= \left| \frac{2S^2 \Delta S}{\rho \kappa S} \right| + \left| \left( -\frac{S^2}{\kappa} \frac{1}{\rho} \frac{\Delta \rho}{\rho} \right) \right| + \left| \left( -\frac{S^2}{\rho} \frac{1}{\kappa} \frac{\Delta \kappa}{\kappa} \right) \right| \\ \frac{\Delta Z T}{Z T} &= \frac{\Delta Z}{Z} = \frac{\Delta Z}{\frac{S^2}{\rho \kappa}} \\ &= \left| 2 \frac{\Delta S}{S} \right| + \left| -\frac{\Delta \rho}{\rho} \right| + \left| -\frac{\Delta \kappa}{\kappa} \right| \quad (\text{S-3}) \end{aligned}$$

As we replace  $\frac{\Delta \rho}{\rho}$ ,  $\frac{\Delta S}{S}$  and  $\frac{\Delta \kappa}{\kappa}$  with the values of standard deviation for  $\rho$ ,  $S$  and  $\kappa$  in formula (S-3), we obtained accuracy for the measurements of  $ZT$  is:

$$\frac{\Delta ZT}{ZT} = \pm \left( \left| 2 \frac{\Delta S}{S} \right| + \left| - \frac{\Delta \rho}{\rho} \right| + \left| - \frac{\Delta \kappa}{\kappa} \right| \right)$$

$$= \pm (|2 \times 2\%| + |4\%| + |5\%|) = \pm 13\% \text{ ( at 525 K)}$$

$$\text{Or } = \pm (|2 \times 1\%| + |3\%| + |4\%|) = \pm 9\% \text{ ( at 300 K)}$$

Now, we calculated accuracy for the measurements of ZT at all the temperatures, which is shown as error bars in Fig. 7(d).

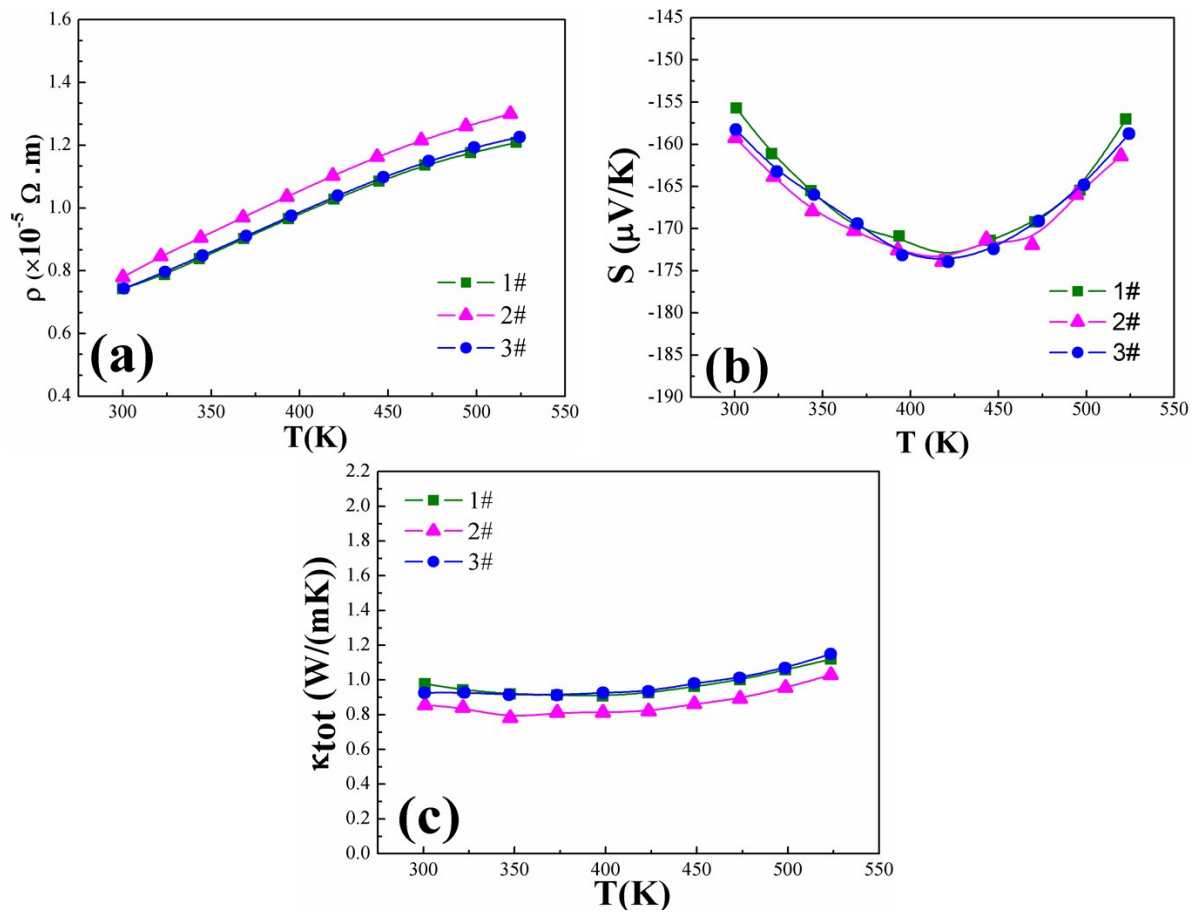

**Figure S6.** Repeatability measurements for three  $\beta$ BT/BTS specimens with  $\beta = 0.5$  vol.% (a) Temperature dependent electrical resistivity (b) thermopower and (c) total thermal conductivity.

## (2) Thermal stability at $T \leq 525\text{K}$

The heating-cooling data of electrical resistivity (a), thermopower (b) and total thermal conductivity (c), as shown in Fig. S7 below, can be repeated completely (with experimental errors) for the first, second and third heat-cooling cycle, indicate that our BTS based composites incorporated with BT nano-inclusions have good thermal stability at temperature range  $T=300\text{K}-525\text{K}$ .

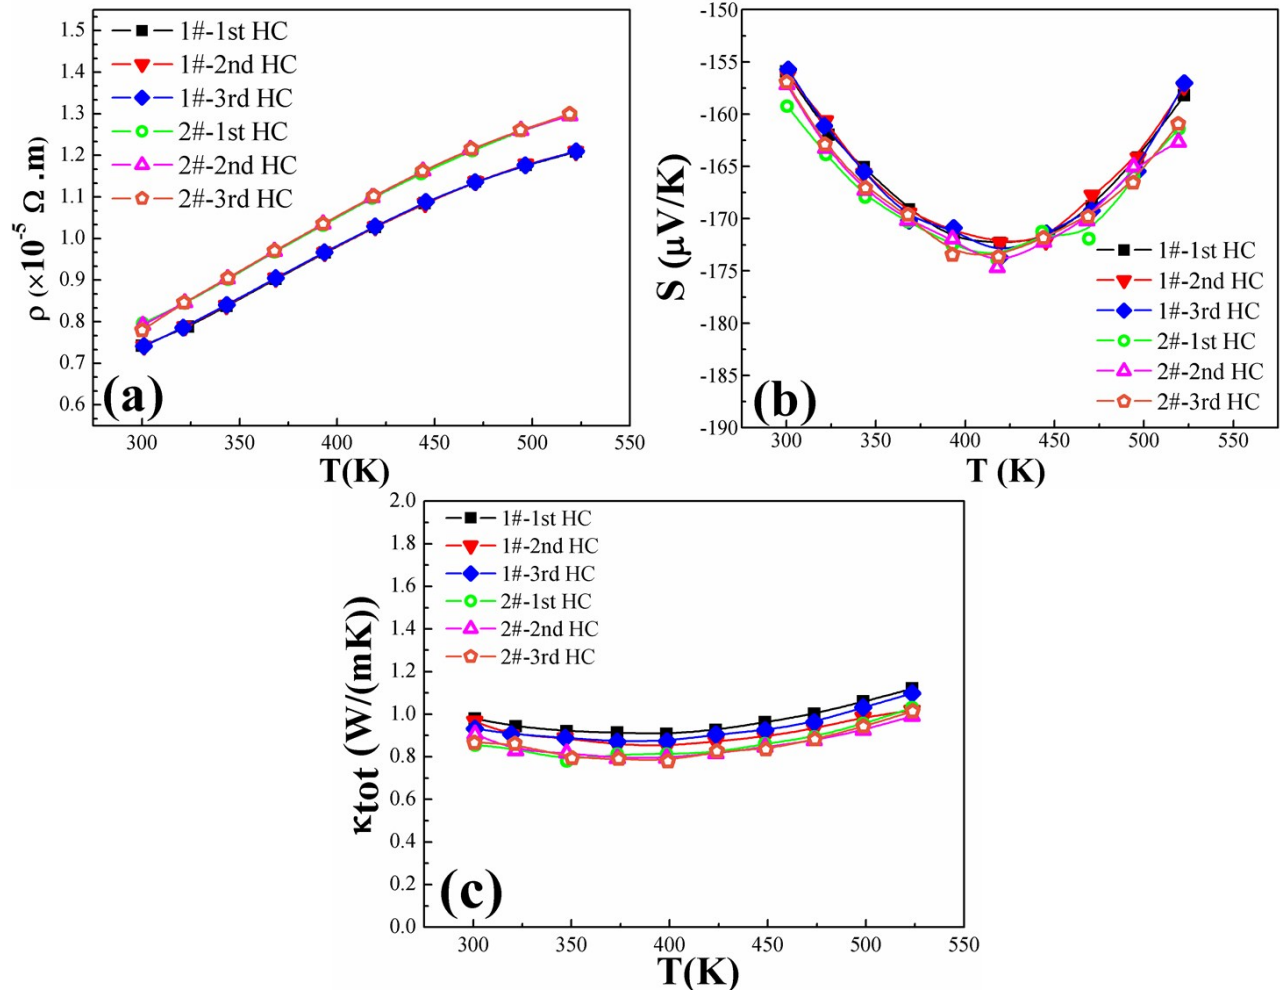

**Figure S7.** Thermal stability measurements (at  $T \leq 525\text{K}$ ) for  $\beta\text{BT}/\text{BTS}$  with  $\beta = 0.5$  vol.% (a) Temperature dependent electrical resistivity (b) thermopower and (c) total thermal conductivity, wherein the symbol 1st HC, 2nd HC and 3rd HC stand for the first, second and third heating-cooling measurements; 1# and 2# represent specimen 1 and specimen 2.

**10. Comparison of  $ZT$  and thermoelectric conversion efficiency  $\eta$  in low temperature range for our BTS composite specimen (incorporated with 0.5 vol.% BT) obtained in**

present work and other typical n-type TE materials reporting high thermoelectric performance.

Fig. S8 and S9 show temperature dependent figure of merit  $ZT$  value comparison for low-temperature BTS system (present work) and other typical medium-temperature n-type thermoelectric material systems [2-9]. Moreover, both thermoelectric conversion efficiency  $\eta$  at  $T < 300\text{ }^\circ\text{C}$  and  $ZT_{max}$  of present optimized BTS system are more competitive than most of the state-of-the-art medium-temperature n-type TE materials, for room temperature applications (as shown in Fig. S8 and S9).

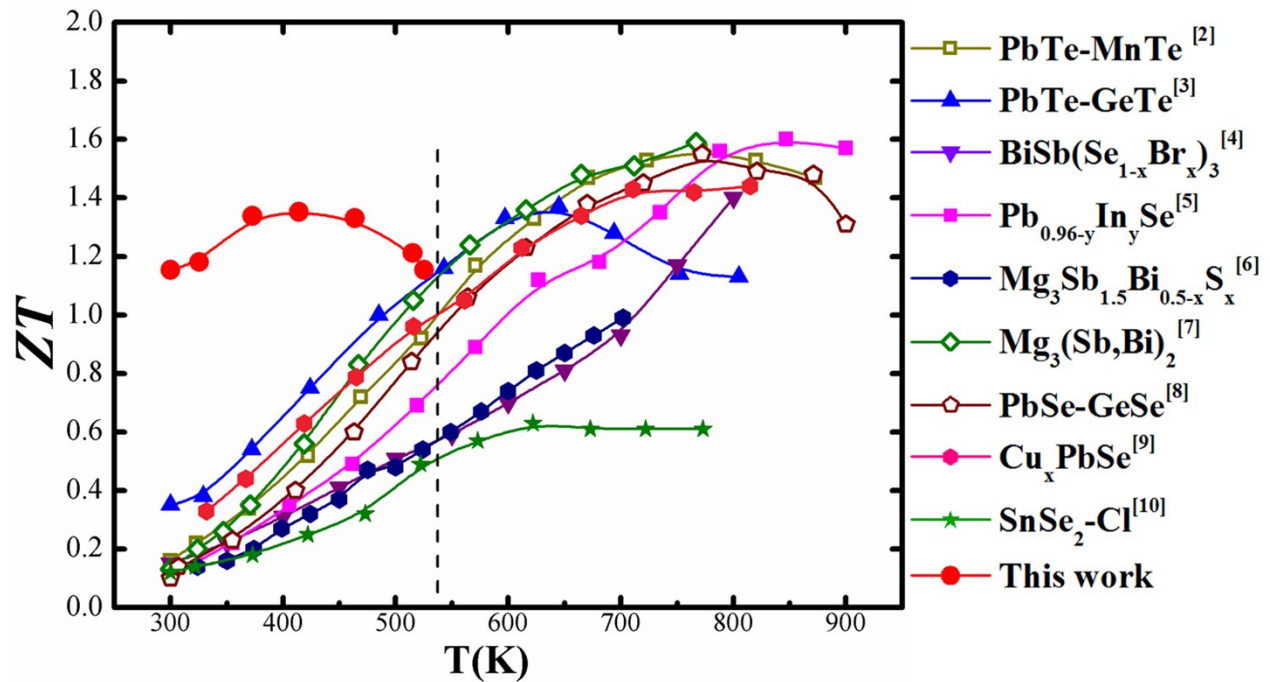

**Figure S8.** Temperature dependence of figure of merit  $ZT$  of our BTS based composite specimen (incorporated with 0.5 vol.% BT) and other typical n-type thermoelectric material systems reporting high thermoelectric performance. Therein one can see that the  $ZT$  values at  $T < 530\text{ K}$  for our BTS system (present work) is much larger than the  $ZT$  values in corresponding temperature range for several typical n-type thermoelectric material systems reporting high thermoelectric performance[2-9].

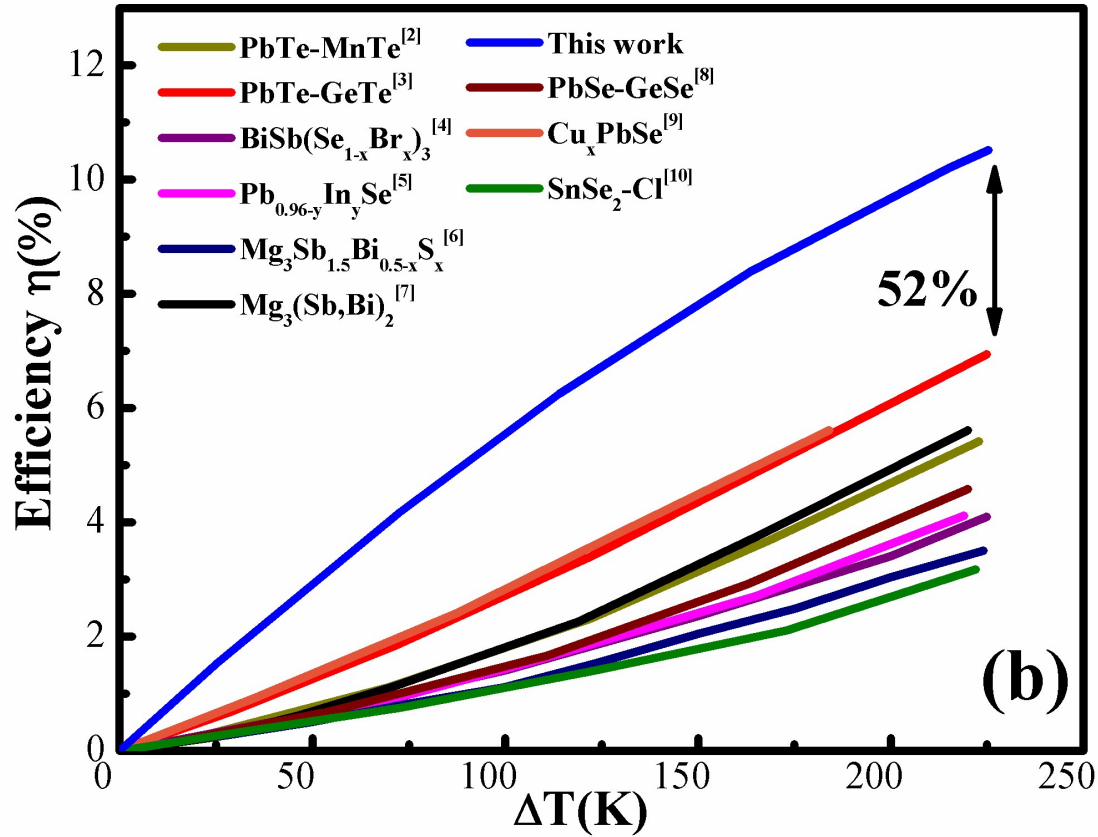

**Figure S7.** Comparison of thermoelectric conversion efficiency  $\eta$  in low temperature range for our BTS composite specimen (incorporated with 0.5 vol.% BT) obtained in present work and other typical n-type TE materials reporting high thermoelectric performance. One can see that conversion efficiency  $\eta$  of our BTS composite specimen is much (at least 52% at  $T=525$  K) larger than that of other high reported  $ZT$  values n-type thermoelectric material systems[2-9].

## References

- [1] Y. Pan, J.-F. Li, Npg Asia Materials, 8 (2016) e275.
- [2] L.-D. Zhao, Y. Xiao, H. Wu, J. Cui, D. Wang, L. Fu, Y. Zhang, Y. Chen, J. He, S.J. Pennycook, Energy & Environmental Science, (2018).
- [3] Z.Z. Luo, X. Zhang, X. Hua, G. Tan, T.P. Bailey, J. Xu, C. Uher, C. Wolverton, V.P. Dravid, Q. Yan, Advanced Functional Materials, (2018) 1801617.

- [4] X. Liu, D. Wang, H. Wu, J. Wang, Y. Zhang, G. Wang, S.J. Pennycook, L.-D. Zhao, *Advanced Functional Materials*, 0 1806558.
- [5] M. Hong, Z.-G. Chen, S. Matsumura, J. Zou, *Nano Energy*, 50 (2018) 785-793.
- [6] J. Zhang, L. Song, K.A. Borup, M.R.V. Jørgensen, B.B. Iversen, *Advanced Energy Materials*, (2018) 1702776.
- [7] J. Shuai, B. Ge, J. Mao, S. Song, Y. Wang, Z. Ren, *Journal of the American Chemical Society*, 140 (2018) 1910-1915.
- [8] L. You, Y. Liu, X. Li, P. Nan, B. Ge, Y. Jiang, P. Luo, S. Pan, Y. Pei, W. Zhang, *Energy & Environmental Science*, (2018).
- [9] Y. Luo, Y. Zheng, Z. Luo, S. Hao, C. Du, Q. Liang, Z. Li, K.A. Khor, K. Hippalgaonkar, J. Xu, *Advanced Energy Materials*, 8 (2018) 1702167.
